# Supplementary material for: Importance-Based Key Basic Event Identification and Evolution Mechanism Investigation of Hydraulic Support Failure to Protect Employee Health
Source: MDPI journal article supplement (doi:10.3390/s21217240), 2021-10-30
Supplement: s1 [file s1]

**Table S1.** The minimal cut sets of hydraulic support failure

| Minimal cut set | Basic event      |
|-----------------|------------------|
| $C_1$           | $X_1$            |
| $C_2$           | $X_{10}$         |
| $C_3$           | $X_{11}$         |
| $C_4$           | $X_{12}, X_{13}$ |
| $C_5$           | $X_{12}, X_{14}$ |
| $C_6$           | $X_{12}, X_{15}$ |
| $C_7$           | $X_{16}$         |
| $C_8$           | $X_{17}, X_{18}$ |
| $C_9$           | $X_{17}, X_{19}$ |
| $C_{10}$        | $X_2, X_3$       |
| $C_{11}$        | $X_2, X_4$       |
| $C_{12}$        | $X_2, X_5$       |
| $C_{13}$        | $X_{20}$         |
| $C_{14}$        | $X_{21}, X_{22}$ |
| $C_{15}$        | $X_6$            |
| $C_{16}$        | $X_7$            |
| $C_{17}$        | $X_8, X_9$       |

**Table S2.** The minimal path sets of hydraulic support failure

| Minimal path set | Basic event                                                                                                         |
|------------------|---------------------------------------------------------------------------------------------------------------------|
| $P_1$            | $X_1, X_2, X_6, X_7, X_8, X_{10}, X_{11}, X_{12}, X_{16}, X_{17}, X_{20}, X_{21}$                                   |
| $P_2$            | $X_1, X_2, X_6, X_7, X_8, X_{10}, X_{11}, X_{12}, X_{16}, X_{17}, X_{20}, X_{22}$                                   |
| $P_3$            | $X_1, X_2, X_6, X_7, X_8, X_{10}, X_{11}, X_{12}, X_{16}, X_{18}, X_{19}, X_{20}, X_{21}$                           |
| $P_4$            | $X_1, X_2, X_6, X_7, X_8, X_{10}, X_{11}, X_{12}, X_{16}, X_{18}, X_{19}, X_{20}, X_{22}$                           |
| $P_5$            | $X_1, X_2, X_6, X_7, X_8, X_{10}, X_{11}, X_{13}, X_{14}, X_{15}, X_{16}, X_{17}, X_{20}, X_{21}$                   |
| $P_6$            | $X_1, X_2, X_6, X_7, X_8, X_{10}, X_{11}, X_{13}, X_{14}, X_{15}, X_{16}, X_{17}, X_{20}, X_{22}$                   |
| $P_7$            | $X_1, X_2, X_6, X_7, X_8, X_{10}, X_{11}, X_{13}, X_{14}, X_{15}, X_{16}, X_{18}, X_{19}, X_{20}, X_{21}$           |
| $P_8$            | $X_1, X_2, X_6, X_7, X_8, X_{10}, X_{11}, X_{13}, X_{14}, X_{15}, X_{16}, X_{18}, X_{19}, X_{20}, X_{22}$           |
| $P_9$            | $X_1, X_2, X_6, X_7, X_9, X_{10}, X_{11}, X_{12}, X_{16}, X_{17}, X_{20}, X_{21}$                                   |
| $P_{10}$         | $X_1, X_2, X_6, X_7, X_9, X_{10}, X_{11}, X_{12}, X_{16}, X_{17}, X_{20}, X_{22}$                                   |
| $P_{11}$         | $X_1, X_2, X_6, X_7, X_9, X_{10}, X_{11}, X_{12}, X_{16}, X_{18}, X_{19}, X_{20}, X_{21}$                           |
| $P_{12}$         | $X_1, X_2, X_6, X_7, X_9, X_{10}, X_{11}, X_{12}, X_{16}, X_{18}, X_{19}, X_{20}, X_{22}$                           |
| $P_{13}$         | $X_1, X_2, X_6, X_7, X_9, X_{10}, X_{11}, X_{13}, X_{14}, X_{15}, X_{16}, X_{17}, X_{20}, X_{21}$                   |
| $P_{14}$         | $X_1, X_2, X_6, X_7, X_9, X_{10}, X_{11}, X_{13}, X_{14}, X_{15}, X_{16}, X_{17}, X_{20}, X_{22}$                   |
| $P_{15}$         | $X_1, X_2, X_6, X_7, X_9, X_{10}, X_{11}, X_{13}, X_{14}, X_{15}, X_{16}, X_{18}, X_{19}, X_{20}, X_{21}$           |
| $P_{16}$         | $X_1, X_2, X_6, X_7, X_9, X_{10}, X_{11}, X_{13}, X_{14}, X_{15}, X_{16}, X_{18}, X_{19}, X_{20}, X_{22}$           |
| $P_{17}$         | $X_1, X_3, X_4, X_5, X_6, X_7, X_8, X_{10}, X_{11}, X_{12}, X_{16}, X_{17}, X_{20}, X_{21}$                         |
| $P_{18}$         | $X_1, X_3, X_4, X_5, X_6, X_7, X_8, X_{10}, X_{11}, X_{12}, X_{16}, X_{17}, X_{20}, X_{22}$                         |
| $P_{19}$         | $X_1, X_3, X_4, X_5, X_6, X_7, X_8, X_{10}, X_{11}, X_{12}, X_{16}, X_{18}, X_{19}, X_{20}, X_{21}$                 |
| $P_{20}$         | $X_1, X_3, X_4, X_5, X_6, X_7, X_8, X_{10}, X_{11}, X_{12}, X_{16}, X_{18}, X_{19}, X_{20}, X_{22}$                 |
| $P_{21}$         | $X_1, X_3, X_4, X_5, X_6, X_7, X_8, X_{10}, X_{11}, X_{13}, X_{14}, X_{15}, X_{16}, X_{17}, X_{20}, X_{21}$         |
| $P_{22}$         | $X_1, X_3, X_4, X_5, X_6, X_7, X_8, X_{10}, X_{11}, X_{13}, X_{14}, X_{15}, X_{16}, X_{17}, X_{20}, X_{22}$         |
| $P_{23}$         | $X_1, X_3, X_4, X_5, X_6, X_7, X_8, X_{10}, X_{11}, X_{13}, X_{14}, X_{15}, X_{16}, X_{18}, X_{19}, X_{20}, X_{21}$ |
| $P_{24}$         | $X_1, X_3, X_4, X_5, X_6, X_7, X_8, X_{10}, X_{11}, X_{13}, X_{14}, X_{15}, X_{16}, X_{18}, X_{19}, X_{20}, X_{22}$ |
| $P_{25}$         | $X_1, X_3, X_4, X_5, X_6, X_7, X_9, X_{10}, X_{11}, X_{12}, X_{16}, X_{17}, X_{20}, X_{21}$                         |
| $P_{26}$         | $X_1, X_3, X_4, X_5, X_6, X_7, X_9, X_{10}, X_{11}, X_{12}, X_{16}, X_{17}, X_{20}, X_{22}$                         |
| $P_{27}$         | $X_1, X_3, X_4, X_5, X_6, X_7, X_9, X_{10}, X_{11}, X_{12}, X_{16}, X_{18}, X_{19}, X_{20}, X_{21}$                 |
| $P_{28}$         | $X_1, X_3, X_4, X_5, X_6, X_7, X_9, X_{10}, X_{11}, X_{12}, X_{16}, X_{18}, X_{19}, X_{20}, X_{22}$                 |
| $P_{29}$         | $X_1, X_3, X_4, X_5, X_6, X_7, X_9, X_{10}, X_{11}, X_{13}, X_{14}, X_{15}, X_{16}, X_{17}, X_{20}, X_{21}$         |
| $P_{30}$         | $X_1, X_3, X_4, X_5, X_6, X_7, X_9, X_{10}, X_{11}, X_{13}, X_{14}, X_{15}, X_{16}, X_{17}, X_{20}, X_{22}$         |
| $P_{31}$         | $X_1, X_3, X_4, X_5, X_6, X_7, X_9, X_{10}, X_{11}, X_{13}, X_{14}, X_{15}, X_{16}, X_{18}, X_{19}, X_{20}, X_{21}$ |
| $P_{32}$         | $X_1, X_3, X_4, X_5, X_6, X_7, X_9, X_{10}, X_{11}, X_{13}, X_{14}, X_{15}, X_{16}, X_{18}, X_{19}, X_{20}, X_{22}$ |
